# Supplementary material for: Genome-wide identification of CBL family and expression analysis of CBLs in response to potassium deficiency in cotton
Source: PeerJ. 2017 Aug 14;5:e3653. doi: 10.7717/peerj.3653 (PMC5560230; doi:10.7717/peerj.3653)
Supplement: Supplemental Information 1 [file peerj-05-3653-s001.xlsx]

## Sheet: Sheet1
homologous gene pairs
Gene name	Gene ID	Location in Chr		Gene name	Gene ID	Location in Chr
GaCBL1-3	Cotton_A_16590	A11	63918211	GaCBL1-4	Cotton_A_09151	A13	44295958
GaCBL1-3	Cotton_A_16590	A11	63918211	GaCBL1-1	Cotton_A_16036	A04	67464923
GaCBL1-4	Cotton_A_09151	A13	44295958	GaCBL1-1	Cotton_A_16036	A04	67464923
GaCBL3-2	Cotton_A_02147	A13	127421083	GaCBL3-1	Cotton_A_06492	A07	29281430
GaCBL3-2	Cotton_A_02147	A13	127421083	GaCBL2	Cotton_A_07469	A08	48747564
GaCBL4-1	Cotton_A_02388	A11	21839946	GaCBL4-2	Cotton_A_13237	A06	16015753
GaCBL8	Cotton_A_08153	A11	63527879	GaCBL4-2	Cotton_A_13237	A06	16015753
GrCBL1-2	Gorai_003G178700	D03	45019469	GrCBL1-3	Gorai_004G191400	D04	50845719
GrCBL1-2	Gorai_003G178700	D03	45019469	GrCBL1-4	Gorai_006G214700	D06	46832994
GrCBL1-2	Gorai_003G178700	D03	45019469	GrCBL1-1	Gorai_007G030300	D07	2078979
GrCBL1-3	Gorai_004G191400	D04	50845719	GrCBL1-4	Gorai_006G214700	D06	46832994
GrCBL1-3	Gorai_004G191400	D04	50845719	GrCBL1-1	Gorai_007G030300	D07	2078979
GrCBL1-4	Gorai_006G214700	D06	46832994	GrCBL1-1	Gorai_007G030300	D07	2078979
GrCBL3-2	Gorai_002G102900	D02	13114131	GrCBL3-3	Gorai_009G450400	D09	70129486
GrCBL3-2	Gorai_002G102900	D02	13114131	GrCBL3-1	Gorai_013G150400	D13	41048670
GrCBL4-1	Gorai_007G015400	D07	1205668	GrCBL9	Gorai_008G255800	D08	53819363
GrCBL4-2	Gorai_006G207100	D06	46248931	GrCBL9	Gorai_008G255800	D08	53819363
GrCBL10-2	Gorai_009G045600	D09	3290164	GrCBL10-1	Gorai_010G101400	D06	18307537
GrCBL1-1	Gorai_007G030300	D07	2078979	GaCBL1-3	Cotton_A_16590	A11	63918211
GrCBL1-1	Gorai_007G030300	D07	2078979	GaCBL1-4	Cotton_A_09151	A13	44295958
GrCBL1-1	Gorai_007G030300	D07	2078979	GaCBL1-1	Cotton_A_16036	A04	67464923
GrCBL1-2	Gorai_003G178700	D03	45019469	GaCBL1-3	Cotton_A_16590	A11	63918211
GrCBL1-2	Gorai_003G178700	D03	45019469	GaCBL1-4	Cotton_A_09151	A13	44295958
GrCBL1-2	Gorai_003G178700	D03	45019469	GaCBL1-1	Cotton_A_16036	A04	67464923
GrCBL1-3	Gorai_004G191400	D04	50845719	GaCBL1-3	Cotton_A_16590	A11	63918211
GrCBL1-3	Gorai_004G191400	D04	50845719	GaCBL1-4	Cotton_A_09151	A13	44295958
GrCBL1-3	Gorai_004G191400	D04	50845719	GaCBL1-1	Cotton_A_16036	A04	67464923
GrCBL1-4	Gorai_006G214700	D06	46832994	GaCBL1-3	Cotton_A_16590	A11	63918211
GrCBL1-4	Gorai_006G214700	D06	46832994	GaCBL1-4	Cotton_A_09151	A13	44295958
GrCBL1-4	Gorai_006G214700	D06	46832994	GaCBL1-1	Cotton_A_16036	A04	67464923
GrCBL3-1	Gorai_013G150400	D13	41048670	GaCBL3-2	Cotton_A_02147	A13	127421083
GrCBL3-1	Gorai_013G150400	D13	41048670	GaCBL3-1	Cotton_A_06492	A07	29281430
GrCBL3-1	Gorai_013G150400	D13	41048670	GaCBL2	Cotton_A_07469	A08	48747564
GrCBL3-2	Gorai_002G102900	D02	13114131	GaCBL3-2	Cotton_A_02147	A13	127421083
GrCBL3-2	Gorai_002G102900	D02	13114131	GaCBL3-1	Cotton_A_06492	A07	29281430
GrCBL3-2	Gorai_002G102900	D02	13114131	GaCBL2	Cotton_A_07469	A08	48747564
GrCBL3-3	Gorai_009G450400	D09	70129486	GaCBL3-1	Cotton_A_06492	A07	29281430
GrCBL3-3	Gorai_009G450400	D09	70129486	GaCBL2	Cotton_A_07469	A08	48747564
GrCBL4-1	Gorai_007G015400	D07	1205668	GaCBL4-1	Cotton_A_02388	A11	21839946
GrCBL4-1	Gorai_007G015400	D07	1205668	GaCBL4-2	Cotton_A_13237	A06	16015753
GrCBL4-2	Gorai_006G207100	D06	46248931	GaCBL8	Cotton_A_08153	A11	63527879
GrCBL4-2	Gorai_006G207100	D06	46248931	GaCBL4-2	Cotton_A_13237	A06	16015753
GrCBL9	Gorai_008G255800	D08	53819363	GaCBL4-1	Cotton_A_02388	A11	21839946
GrCBL9	Gorai_008G255800	D08	53819363	GaCBL8	Cotton_A_08153	A11	63527879
GrCBL9	Gorai_008G255800	D08	53819363	GaCBL4-2	Cotton_A_13237	A06	16015753
GrCBL10-1	Gorai_010G101400	D06	18307537	GaCBL10-1	Cotton_A_14000	A01	123893941
GrCBL10-1	Gorai_010G101400	D06	18307537	GaCBL10-2	Cotton_A_34841	A08	13668694
GrCBL10-2	Gorai_009G045600	D09	3290164	GaCBL10-1	Cotton_A_14000	A01	123893941
GrCBL10-2	Gorai_009G045600	D09	3290164	GaCBL10-2	Cotton_A_34841	A08	13668694
GhCBL1-1	Gh_A11G0257	At11	2399227	GaCBL1-3	Cotton_A_16590	A11	63918211
GhCBL1-1	Gh_A11G0257	At11	2399227	GaCBL1-4	Cotton_A_09151	A13	44295958
GhCBL1-1	Gh_A11G0257	At11	2399227	GaCBL1-1	Cotton_A_16036	A04	67464923
GhCBL1-2	Gh_D11G0276	Dt11	2362372	GaCBL1-3	Cotton_A_16590	A11	63918211
GhCBL1-2	Gh_D11G0276	Dt11	2362372	GaCBL1-4	Cotton_A_09151	A13	44295958
GhCBL1-2	Gh_D11G0276	Dt11	2362372	GaCBL1-1	Cotton_A_16036	A04	67464923
GhCBL1-3	Gh_A03G0043	At03	617886	GaCBL1-3	Cotton_A_16590	A11	63918211
GhCBL1-3	Gh_A03G0043	At03	617886	GaCBL1-4	Cotton_A_09151	A13	44295958
GhCBL1-3	Gh_A03G0043	At03	617886	GaCBL1-1	Cotton_A_16036	A04	67464923
GhCBL1-4	Gh_D09G1875	Dt09	46260361	GaCBL1-3	Cotton_A_16590	A11	63918211
GhCBL1-4	Gh_D09G1875	Dt09	46260361	GaCBL1-4	Cotton_A_09151	A13	44295958
GhCBL1-4	Gh_D09G1875	Dt09	46260361	GaCBL1-1	Cotton_A_16036	A04	67464923
GhCBL1-5	Gh_A09G1766	At09	71000936	GaCBL1-3	Cotton_A_16590	A11	63918211
GhCBL1-5	Gh_A09G1766	At09	71000936	GaCBL1-4	Cotton_A_09151	A13	44295958
GhCBL1-5	Gh_A09G1766	At09	71000936	GaCBL1-1	Cotton_A_16036	A04	67464923
GhCBL3-1	Gh_A01G0740	At01	14217721	GaCBL3-2	Cotton_A_02147	A13	127421083
GhCBL3-1	Gh_A01G0740	At01	14217721	GaCBL3-1	Cotton_A_06492	A07	29281430
GhCBL3-1	Gh_A01G0740	At01	14217721	GaCBL2	Cotton_A_07469	A08	48747564
GhCBL3-2	Gh_D01G0760	Dt01	10911436	GaCBL3-2	Cotton_A_02147	A13	127421083
GhCBL3-2	Gh_D01G0760	Dt01	10911436	GaCBL3-1	Cotton_A_06492	A07	29281430
GhCBL3-2	Gh_D01G0760	Dt01	10911436	GaCBL2	Cotton_A_07469	A08	48747564
GhCBL3-3	Gh_A13G1099	At13	61349629	GaCBL3-2	Cotton_A_02147	A13	127421083
GhCBL3-3	Gh_A13G1099	At13	61349629	GaCBL3-1	Cotton_A_06492	A07	29281430
GhCBL3-4	Gh_D13G1364	Dt13	42688671	GaCBL3-2	Cotton_A_02147	A13	127421083
GhCBL3-4	Gh_D13G1364	Dt13	42688671	GaCBL3-1	Cotton_A_06492	A07	29281430
GhCBL3-4	Gh_D13G1364	Dt13	42688671	GaCBL2	Cotton_A_07469	A08	48747564
GhCBL3-5	Gh_A04G0051	At04	534686	GaCBL3-2	Cotton_A_02147	A13	127421083
GhCBL3-5	Gh_A04G0051	At04	534686	GaCBL3-1	Cotton_A_06492	A07	29281430
GhCBL3-5	Gh_A04G0051	At04	534686	GaCBL2	Cotton_A_07469	A08	48747564
GhCBL3-6	Gh_D05G3682	Dt05	61377180	GaCBL3-1	Cotton_A_06492	A07	29281430
GhCBL3-6	Gh_D05G3682	Dt05	61377180	GaCBL2	Cotton_A_07469	A08	48747564
GhCBL4-1	Gh_A11G0126	At11	1290093	GaCBL4-1	Cotton_A_02388	A11	21839946
GhCBL4-1	Gh_A11G0126	At11	1290093	GaCBL4-2	Cotton_A_13237	A06	16015753
GhCBL4-2	Gh_D11G0140	Dt11	1292324	GaCBL4-1	Cotton_A_02388	A11	21839946
GhCBL4-2	Gh_D11G0140	Dt11	1292324	GaCBL4-2	Cotton_A_13237	A06	16015753
GhCBL4-3	Gh_A12G2144	At12	84285566	GaCBL4-1	Cotton_A_02388	A11	21839946
GhCBL4-3	Gh_A12G2144	At12	84285566	GaCBL8	Cotton_A_08153	A11	63527879
GhCBL4-3	Gh_A12G2144	At12	84285566	GaCBL4-2	Cotton_A_13237	A06	16015753
GhCBL4-4	Gh_A09G1696	At09	70437594	GaCBL8	Cotton_A_08153	A11	63527879
GhCBL4-4	Gh_A09G1696	At09	70437594	GaCBL4-2	Cotton_A_13237	A06	16015753
GhCBL4-5	Gh_D12G2320	Dt12	56354388	GaCBL4-1	Cotton_A_02388	A11	21839946
GhCBL4-5	Gh_D12G2320	Dt12	56354388	GaCBL8	Cotton_A_08153	A11	63527879
GhCBL4-5	Gh_D12G2320	Dt12	56354388	GaCBL4-2	Cotton_A_13237	A06	16015753
GhCBL8	Gh_D09G1801	Dt09	45645615	GaCBL8	Cotton_A_08153	A11	63527879
GhCBL8	Gh_D09G1801	Dt09	45645615	GaCBL4-2	Cotton_A_13237	A06	16015753
GhCBL9	Gh_D08G1764	Dt08	54018081	GaCBL1-3	Cotton_A_16590	A11	63918211
GhCBL9	Gh_D08G1764	Dt08	54018081	GaCBL1-4	Cotton_A_09151	A13	44295958
GhCBL9	Gh_D08G1764	Dt08	54018081	GaCBL1-1	Cotton_A_16036	A04	67464923
GhCBL10-1	Gh_A06G0800	At06	29362740	GaCBL10-1	Cotton_A_14000	A01	123893941
GhCBL10-1	Gh_A06G0800	At06	29362740	GaCBL3-1	Cotton_A_06492	A07	29281430
GhCBL10-1	Gh_A06G0800	At06	29362740	GaCBL10-2	Cotton_A_34841	A08	13668694
GhCBL10-2	Gh_D06G0922	Dt06	18568469	GaCBL10-1	Cotton_A_14000	A01	123893941
GhCBL10-2	Gh_D06G0922	Dt06	18568469	GaCBL10-2	Cotton_A_34841	A08	13668694
GhCBL10-3	Gh_A05G0335	At05	3681913	GaCBL10-1	Cotton_A_14000	A01	123893941
GhCBL10-3	Gh_A05G0335	At05	3681913	GaCBL3-1	Cotton_A_06492	A07	29281430
GhCBL10-3	Gh_A05G0335	At05	3681913	GaCBL10-2	Cotton_A_34841	A08	13668694
GhCBL10-4	Gh_D05G0440	Dt05	3546910	GaCBL10-1	Cotton_A_14000	A01	123893941
GhCBL10-4	Gh_D05G0440	Dt05	3546910	GaCBL10-2	Cotton_A_34841	A08	13668694
GhCBL9	Gh_D08G1764	Dt08	54018081	GrCBL1-1	Gorai_007G030300	D07	2078979
GhCBL1-4	Gh_D09G1875	Dt09	46260361	GrCBL1-1	Gorai_007G030300	D07	2078979
GhCBL1-2	Gh_D11G0276	Dt11	2362372	GrCBL1-1	Gorai_007G030300	D07	2078979
GhCBL4-2	Gh_D11G0140	Dt11	1292324	GrCBL4-1	Gorai_007G015400	D07	1205668
GhCBL9	Gh_D08G1764	Dt08	54018081	GrCBL1-2	Gorai_003G178700	D03	45019469
GhCBL1-4	Gh_D09G1875	Dt09	46260361	GrCBL1-2	Gorai_003G178700	D03	45019469
GhCBL1-2	Gh_D11G0276	Dt11	2362372	GrCBL1-2	Gorai_003G178700	D03	45019469
GhCBL9	Gh_D08G1764	Dt08	54018081	GrCBL1-3	Gorai_004G191400	D04	50845719
GhCBL1-4	Gh_D09G1875	Dt09	46260361	GrCBL1-3	Gorai_004G191400	D04	50845719
GhCBL1-2	Gh_D11G0276	Dt11	2362372	GrCBL1-3	Gorai_004G191400	D04	50845719
GhCBL9	Gh_D08G1764	Dt08	54018081	GrCBL1-4	Gorai_006G214700	D06	46832994
GhCBL1-4	Gh_D09G1875	Dt09	46260361	GrCBL1-4	Gorai_006G214700	D06	46832994
GhCBL8	Gh_D09G1801	Dt09	45645615	GrCBL4-2	Gorai_006G207100	D06	46248931
GhCBL1-2	Gh_D11G0276	Dt11	2362372	GrCBL1-4	Gorai_006G214700	D06	46832994
GhCBL3-2	Gh_D01G0760	Dt01	10911436	GrCBL3-1	Gorai_013G150400	D13	41048670
GhCBL3-4	Gh_D13G1364	Dt13	42688671	GrCBL3-1	Gorai_013G150400	D13	41048670
GhCBL3-2	Gh_D01G0760	Dt01	10911436	GrCBL3-2	Gorai_002G102900	D02	13114131
GhCBL3-6	Gh_D05G3682	Dt05	61377180	GrCBL3-2	Gorai_002G102900	D02	13114131
GhCBL3-4	Gh_D13G1364	Dt13	42688671	GrCBL3-2	Gorai_002G102900	D02	13114131
GhCBL3-2	Gh_D01G0760	Dt01	10911436	GrCBL3-3	Gorai_009G450400	D09	70129486
GhCBL4-5	Gh_D12G2320	Dt12	56354388	GrCBL4-1	Gorai_007G015400	D07	1205668
GhCBL4-5	Gh_D12G2320	Dt12	56354388	GrCBL4-2	Gorai_006G207100	D06	46248931
GhCBL8	Gh_D09G1801	Dt09	45645615	GrCBL9	Gorai_008G255800	D08	53819363
GhCBL4-2	Gh_D11G0140	Dt11	1292324	GrCBL9	Gorai_008G255800	D08	53819363
GhCBL4-5	Gh_D12G2320	Dt12	56354388	GrCBL9	Gorai_008G255800	D08	53819363
GhCBL10-4	Gh_D05G0440	Dt05	3546910	GrCBL10-1	Gorai_010G101400	D06	18307537
GhCBL10-2	Gh_D06G0922	Dt06	18568469	GrCBL10-1	Gorai_010G101400	D06	18307537
GhCBL10-3	Gh_A05G0335	At05	3681913	GrCBL10-2	Gorai_009G045600	D09	3290164
GhCBL10-4	Gh_D05G0440	Dt05	3546910	GrCBL10-2	Gorai_009G045600	D09	3290164
GhCBL10-2	Gh_D06G0922	Dt06	18568469	GrCBL10-2	Gorai_009G045600	D09	3290164
GhCBL1-1	Gh_A11G0257	At11	2399227	GrCBL1-2	Gorai_003G178700	D03	45019469
GhCBL1-1	Gh_A11G0257	At11	2399227	GrCBL1-3	Gorai_004G191400	D04	50845719
GhCBL1-1	Gh_A11G0257	At11	2399227	GrCBL1-4	Gorai_006G214700	D06	46832994
GhCBL1-1	Gh_A11G0257	At11	2399227	GrCBL1-1	Gorai_007G030300	D07	2078979
GhCBL4-1	Gh_A11G0126	At11	1290093	GrCBL4-1	Gorai_007G015400	D07	1205668
GhCBL1-3	Gh_A03G0043	At03	617886	GrCBL1-2	Gorai_003G178700	D03	45019469
GhCBL1-3	Gh_A03G0043	At03	617886	GrCBL1-3	Gorai_004G191400	D04	50845719
GhCBL1-3	Gh_A03G0043	At03	617886	GrCBL1-4	Gorai_006G214700	D06	46832994
GhCBL1-3	Gh_A03G0043	At03	617886	GrCBL1-1	Gorai_007G030300	D07	2078979
GhCBL1-3	Gh_A03G0043	At03	617886	GrCBL4-1	Gorai_007G015400	D07	1205668
GhCBL1-5	Gh_A09G1766	At09	71000936	GrCBL1-2	Gorai_003G178700	D03	45019469
GhCBL1-5	Gh_A09G1766	At09	71000936	GrCBL1-3	Gorai_004G191400	D04	50845719
GhCBL1-5	Gh_A09G1766	At09	71000936	GrCBL1-4	Gorai_006G214700	D06	46832994
GhCBL4-4	Gh_A09G1696	At09	70437594	GrCBL4-2	Gorai_006G207100	D06	46248931
GhCBL1-5	Gh_A09G1766	At09	71000936	GrCBL1-1	Gorai_007G030300	D07	2078979
GhCBL3-1	Gh_A01G0740	At01	14217721	GrCBL3-2	Gorai_002G102900	D02	13114131
GhCBL3-1	Gh_A01G0740	At01	14217721	GrCBL3-1	Gorai_013G150400	D13	41048670
GhCBL3-3	Gh_A13G1099	At13	61349629	GrCBL3-2	Gorai_002G102900	D02	13114131
GhCBL3-3	Gh_A13G1099	At13	61349629	GrCBL3-1	Gorai_013G150400	D13	41048670
GhCBL3-5	Gh_A04G0051	At04	534686	GrCBL3-2	Gorai_002G102900	D02	13114131
GhCBL3-5	Gh_A04G0051	At04	534686	GrCBL3-3	Gorai_009G450400	D09	70129486
GhCBL4-1	Gh_A11G0126	At11	1290093	GrCBL4-2	Gorai_006G207100	D06	46248931
GhCBL4-1	Gh_A11G0126	At11	1290093	GrCBL9	Gorai_008G255800	D08	53819363
GhCBL4-3	Gh_A12G2144	At12	84285566	GrCBL4-2	Gorai_006G207100	D06	46248931
GhCBL4-3	Gh_A12G2144	At12	84285566	GrCBL4-1	Gorai_007G015400	D07	1205668
GhCBL4-3	Gh_A12G2144	At12	84285566	GrCBL9	Gorai_008G255800	D08	53819363
GhCBL4-4	Gh_A09G1696	At09	70437594	GrCBL9	Gorai_008G255800	D08	53819363
GhCBL10-1	Gh_A06G0800	At06	29362740	GrCBL10-2	Gorai_009G045600	D09	3290164
GhCBL10-1	Gh_A06G0800	At06	29362740	GrCBL10-1	Gorai_010G101400	D06	18307537
GhCBL10-3	Gh_A05G0335	At05	3681913	GrCBL10-1	Gorai_010G101400	D06	18307537
GhCBL1-1	Gh_A11G0257	At11	2399227	GhCBL9	Gh_D08G1764	Dt08	54018081
GhCBL1-1	Gh_A11G0257	At11	2399227	GhCBL1-4	Gh_D09G1875	Dt09	46260361
GhCBL1-1	Gh_A11G0257	At11	2399227	GhCBL1-2	Gh_D11G0276	Dt11	2362372
GhCBL4-1	Gh_A11G0126	At11	1290093	GhCBL4-2	Gh_D11G0140	Dt11	1292324
GhCBL1-3	Gh_A03G0043	At03	617886	GhCBL4-2	Gh_D11G0140	Dt11	1292324
GhCBL1-3	Gh_A03G0043	At03	617886	GhCBL1-5	Gh_A09G1766	At09	71000936
GhCBL1-3	Gh_A03G0043	At03	617886	GhCBL1-1	Gh_A11G0257	At11	2399227
GhCBL1-3	Gh_A03G0043	At03	617886	GhCBL9	Gh_D08G1764	Dt08	54018081
GhCBL1-3	Gh_A03G0043	At03	617886	GhCBL1-4	Gh_D09G1875	Dt09	46260361
GhCBL1-3	Gh_A03G0043	At03	617886	GhCBL1-2	Gh_D11G0276	Dt11	2362372
GhCBL1-4	Gh_D09G1875	Dt09	46260361	GhCBL1-2	Gh_D11G0276	Dt11	2362372
GhCBL1-5	Gh_A09G1766	At09	71000936	GhCBL1-1	Gh_A11G0257	At11	2399227
GhCBL1-5	Gh_A09G1766	At09	71000936	GhCBL9	Gh_D08G1764	Dt08	54018081
GhCBL1-5	Gh_A09G1766	At09	71000936	GhCBL1-4	Gh_D09G1875	Dt09	46260361
GhCBL4-4	Gh_A09G1696	At09	70437594	GhCBL8	Gh_D09G1801	Dt09	45645615
GhCBL1-5	Gh_A09G1766	At09	71000936	GhCBL1-2	Gh_D11G0276	Dt11	2362372
GhCBL3-1	Gh_A01G0740	At01	14217721	GhCBL3-5	Gh_A04G0051	At04	534686
GhCBL3-1	Gh_A01G0740	At01	14217721	GhCBL3-3	Gh_A13G1099	At13	61349629
GhCBL3-1	Gh_A01G0740	At01	14217721	GhCBL3-2	Gh_D01G0760	Dt01	10911436
GhCBL3-1	Gh_A01G0740	At01	14217721	GhCBL3-6	Gh_D05G3682	Dt05	61377180
GhCBL3-1	Gh_A01G0740	At01	14217721	GhCBL3-4	Gh_D13G1364	Dt13	42688671
GhCBL3-2	Gh_D01G0760	Dt01	10911436	GhCBL3-6	Gh_D05G3682	Dt05	61377180
GhCBL3-2	Gh_D01G0760	Dt01	10911436	GhCBL3-4	Gh_D13G1364	Dt13	42688671
GhCBL3-3	Gh_A13G1099	At13	61349629	GhCBL3-2	Gh_D01G0760	Dt01	10911436
GhCBL3-3	Gh_A13G1099	At13	61349629	GhCBL3-4	Gh_D13G1364	Dt13	42688671
GhCBL3-5	Gh_A04G0051	At04	534686	GhCBL3-2	Gh_D01G0760	Dt01	10911436
GhCBL3-5	Gh_A04G0051	At04	534686	GhCBL3-6	Gh_D05G3682	Dt05	61377180
GhCBL4-1	Gh_A11G0126	At11	1290093	GhCBL4-3	Gh_A12G2144	At12	84285566
GhCBL4-1	Gh_A11G0126	At11	1290093	GhCBL8	Gh_D09G1801	Dt09	45645615
GhCBL4-1	Gh_A11G0126	At11	1290093	GhCBL4-5	Gh_D12G2320	Dt12	56354388
GhCBL4-2	Gh_D11G0140	Dt11	1292324	GhCBL4-5	Gh_D12G2320	Dt12	56354388
GhCBL4-3	Gh_A12G2144	At12	84285566	GhCBL8	Gh_D09G1801	Dt09	45645615
GhCBL4-3	Gh_A12G2144	At12	84285566	GhCBL4-2	Gh_D11G0140	Dt11	1292324
GhCBL4-3	Gh_A12G2144	At12	84285566	GhCBL4-5	Gh_D12G2320	Dt12	56354388
GhCBL4-4	Gh_A09G1696	At09	70437594	GhCBL4-3	Gh_A12G2144	At12	84285566
GhCBL8	Gh_D09G1801	Dt09	45645615	GhCBL1-2	Gh_D11G0276	Dt11	2362372
GhCBL8	Gh_D09G1801	Dt09	45645615	GhCBL4-5	Gh_D12G2320	Dt12	56354388
GhCBL9	Gh_D08G1764	Dt08	54018081	GhCBL1-4	Gh_D09G1875	Dt09	46260361
GhCBL9	Gh_D08G1764	Dt08	54018081	GhCBL1-2	Gh_D11G0276	Dt11	2362372
GhCBL10-1	Gh_A06G0800	At06	29362740	GhCBL10-4	Gh_D05G0440	Dt05	3546910
GhCBL10-1	Gh_A06G0800	At06	29362740	GhCBL10-2	Gh_D06G0922	Dt06	18568469
GhCBL10-3	Gh_A05G0335	At05	3681913	GhCBL10-1	Gh_A06G0800	At06	29362740
GhCBL10-3	Gh_A05G0335	At05	3681913	GhCBL10-4	Gh_D05G0440	Dt05	3546910
GhCBL10-3	Gh_A05G0335	At05	3681913	GhCBL10-2	Gh_D06G0922	Dt06	18568469
GhCBL10-4	Gh_D05G0440	Dt05	3546910	GhCBL10-2	Gh_D06G0922	Dt06	18568469
